# Supplementary material for: Effect of home-based specialised palliative care and dyadic psychological intervention on caregiver anxiety and depression: a randomised controlled trial
Source: PubMed Central journal article supplement (PMC6265292; doi:10.1038/s41416-018-0193-8), 2018-11-14

Figure S2. Observed proportion of caregivers scoring above cut-off scores for depression

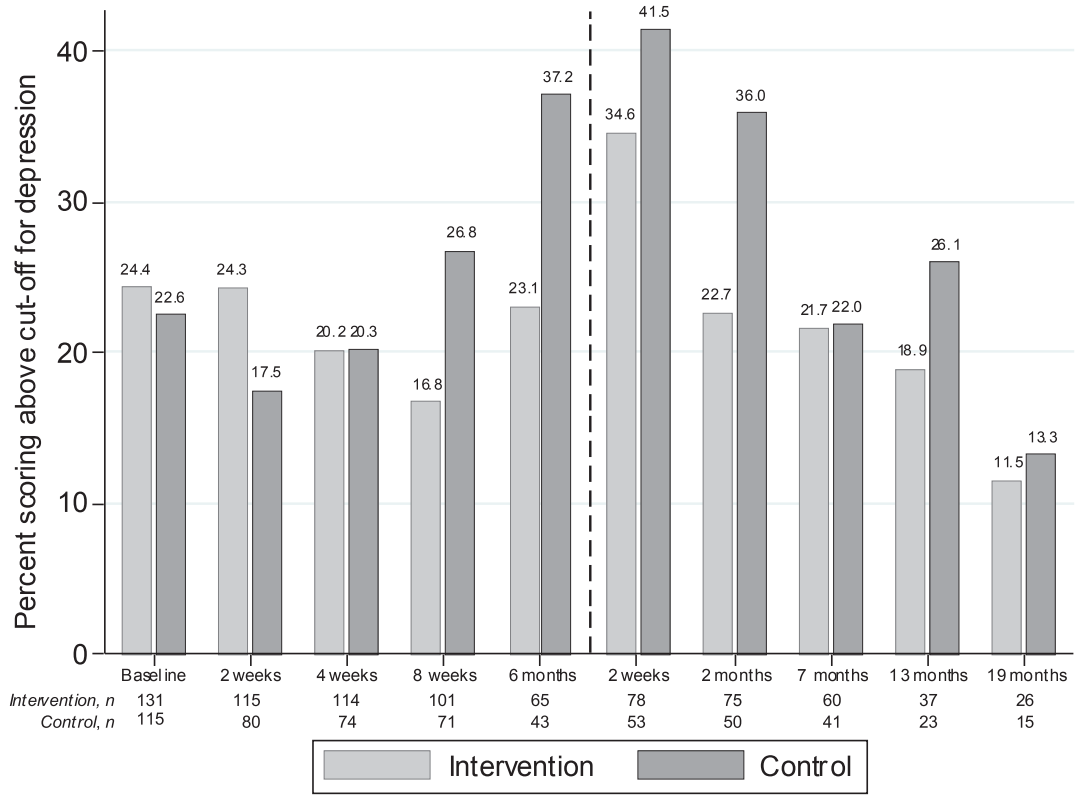

Supplement: 41416_2018_193_MOESM2_ESM.pdf [file 41416_2018_193_MOESM2_ESM.pdf]
