# Supplementary material for: Effect of home-based specialised palliative care and dyadic psychological intervention on caregiver anxiety and depression: a randomised controlled trial
Source: PubMed Central journal article supplement (PMC6265292; doi:10.1038/s41416-018-0193-8), 2018-11-14
Supplement: 41416_2018_193_MOESM3_ESM.pdf [file 41416_2018_193_MOESM3_ESM.pdf]

**Table S1. Estimated differences in change scores from baseline for anxiety between caregivers in the intervention and control group (Online only)**

| Follow-up time point                | n                           | Mixed model results      |           | Multiple imputation      | Multiple imputation, shifted values | Raw mean change score          |                           | Estimated mean change score |                        |
|-------------------------------------|-----------------------------|--------------------------|-----------|--------------------------|-------------------------------------|--------------------------------|---------------------------|-----------------------------|------------------------|
|                                     |                             | Mean difference (95% CI) | Cohen's d | Mean difference (95% CI) | Mean difference (95% CI)            | Intervention group (mean (SD)) | Control group (mean (SD)) | Intervention group (95% CI) | Control group (95% CI) |
| 2 weeks                             | 192                         | -0.04 (-0.18; 0.09)      | -0.07     | -0.07 (-0.22; 0.08)      | -0.28 (-0.55; -0.02)                | -0.13 (0.39)                   | -0.04 (0.38)              | -0.10 (-0.21; 0.01)         | -0.05 (-0.18; 0.07)    |
| 4 weeks                             | 187                         | -0.02 (-0.15; 0.12)      | -0.03     | -0.02 (-0.17; 0.13)      | -0.21 (-0.46; 0.03)                 | -0.12 (0.48)                   | -0.07 (0.36)              | -0.10 (-0.21; 0.01)         | -0.08 (-0.21; 0.04)    |
| 8 weeks                             | 173                         | -0.14 (-0.28; -0.01)     | -0.22     | -0.20 (-0.36; -0.03)     | -0.46 (-0.72; -0.20)                | -0.12 (0.47)                   | 0.04 (0.56)               | -0.10 (-0.21; 0.01)         | 0.04 (-0.08; 0.17)     |
| 6 months                            | 108                         | -0.29 (-0.45; -0.13)     | -0.45     | -0.35 (-0.61; -0.09)     | -0.58 (-1.11; -0.04)                | -0.08 (0.44)                   | 0.21 (0.74)               | -0.04(-0.17; 0.09)          | 0.25 (0.10; 0.39)      |
| <b>Bereavement follow-up</b>        |                             |                          |           |                          |                                     |                                |                           |                             |                        |
| 2 weeks                             | 131                         | -0.25 (-0.47; -0.04)     | -0.39     | -0.22 (-0.57; 0.12)      | -0.90 (-1.64; -0.17)                | -0.10 (0.65)                   | 0.22 (0.85)               | -0.02 (-0.18; 0.13)         | 0.23 (0.05; 0.41)      |
| 2 months                            | 125                         | -0.19 (-0.40; 0.03)      | -0.29     | -0.16 (-0.48; 0.17)      | -0.86 (-1.55; -0.16)                | -0.20 (0.56)                   | 0.10 (0.78)               | -0.13 (-0.29; 0.02)         | 0.05 (-0.13; 0.23)     |
| 7 months                            | 101                         | -0.08 (-0.31; 0.15)      | -0.12     | -0.05 (-0.37; 0.28)      | -0.63 (-1.32; 0.07)                 | -0.29 (0.61)                   | -0.11 (0.85)              | -0.20 (-0.36; -0.03)        | -0.12 (-0.31; 0.07)    |
| 13 months                           | 60                          | -0.18 (-0.46; 0.09)      | -0.29     | -0.06 (-0.43; 0.32)      | -0.13 (-1.32; 1.06)                 | -0.44 (0.59)                   | -0.23 (0.74)              | -0.37 (-0.55; -0.18)        | -0.18 (-0.41; 0.04)    |
| 19 months                           | 41                          | -0.19 (-0.52; 0.15)      | -0.29     | -0.16 (-1.08; 0.76)      | -0.83 (-7.34; 5.68)                 | -0.56 (0.60)                   | -0.28 (0.72)              | -0.48 (-0.70; -0.27)        | -0.30 (-0.57; -0.02)   |
| <b>Main effect of randomization</b> | 246                         | -0.12 (-0.22; -0.01)     | -0.19     | -0.16 (-0.30; -0.03)     | -0.42 (-0.68; -0.16)                |                                |                           |                             |                        |
| <b>Test for interaction*:</b>       | F(8, 562) = 1.82 p = 0.0705 |                          |           |                          |                                     |                                |                           |                             |                        |

\* Interaction of follow-up time point (categorical) and randomization group

The main effect of time was not estimated, as this was not the main interest.
