# Supplementary material for: Effect of home-based specialised palliative care and dyadic psychological intervention on caregiver anxiety and depression: a randomised controlled trial
Source: PubMed Central journal article supplement (PMC6265292; doi:10.1038/s41416-018-0193-8), 2018-11-14
Supplement: 41416_2018_193_MOESM4_ESM.pdf [file 41416_2018_193_MOESM4_ESM.pdf]

**Table S2. Estimated differences in change scores from baseline for depression between caregivers in the intervention and control group (Online only)**

| Follow-up time point                | n                            | Mixed model results      |           | Multiple imputation      | Multiple imputation, shifted values | Raw mean change score          |                           | Estimated mean change score |                        |
|-------------------------------------|------------------------------|--------------------------|-----------|--------------------------|-------------------------------------|--------------------------------|---------------------------|-----------------------------|------------------------|
|                                     |                              | Mean difference (95% CI) | Cohen's d | Mean difference (95% CI) | Mean difference (95% CI)            | Intervention group (mean (SD)) | Control group (mean (SD)) | Intervention group (95% CI) | Control group (95% CI) |
| 2 weeks                             | 195                          | 0.00 (-0.12; 0.12)       | 0.00      | -0.01 (-0.13; 0.11)      | -0.20 (-0.46; 0.06)                 | -0.06 (0.42)                   | -0.05 (0.41)              | -0.07 (-0.18; 0.04)         | -0.07 (-0.20; 0.05)    |
| 4 weeks                             | 188                          | -0.02 (-0.15; 0.11)      | -0.03     | -0.03 (-0.17; 0.11)      | -0.21 (-0.47; 0.05)                 | -0.05 (0.48)                   | -0.02 (0.43)              | -0.07 (-0.18; 0.04)         | -0.05 (-0.18; 0.08)    |
| 8 weeks                             | 172                          | -0.17 (-0.33; -0.02)     | -0.26     | -0.19 (-0.36; -0.02)     | -0.49 (-0.78; -0.20)                | -0.07 (0.46)                   | 0.10 (0.66)               | -0.08 (-0.21; 0.04)         | 0.09 (-0.06; 0.23)     |
| 6 months                            | 108                          | -0.27 (-0.49; -0.05)     | -0.41     | -0.30 (-0.55; -0.05)     | -0.44 (-0.91; 0.03)                 | 0.04 (0.53)                    | 0.22 (0.69)               | 0.02 (-0.14; 0.18)          | 0.29 (0.10; 0.48)      |
| <b>Bereavement follow-up</b>        |                              |                          |           |                          |                                     |                                |                           |                             |                        |
| 2 weeks                             | 131                          | -0.28 (-0.52; -0.03)     | -0.42     | -0.25 (-0.55; 0.05)      | -1.00 (-1.51; -0.49)                | 0.18 (0.65)                    | 0.48 (0.85)               | 0.19 (0.01; 0.37)           | 0.47 (0.26; 0.67)      |
| 2 months                            | 125                          | -0.24 (-0.48; -0.01)     | -0.37     | -0.24 (-0.52; 0.04)      | -0.89 (-1.40; -0.38)                | 0.05 (0.59)                    | 0.40 (0.93)               | 0.06 (-0.11; 0.23)          | 0.31 (0.11; 0.51)      |
| 7 months                            | 101                          | -0.20 (-0.49; 0.09)      | -0.30     | -0.14 (-0.47; 0.18)      | -0.52 (-1.13; 0.10)                 | -0.07 (0.79)                   | 0.18 (0.91)               | -0.06 (-0.26; 0.15)         | 0.14 (-0.09; 0.38)     |
| 13 months                           | 60                           | -0.15 (-0.48; 0.18)      | -0.23     | -0.03 (-0.40; 0.34)      | -0.51 (-1.59; 0.58)                 | -0.14 (0.80)                   | -0.02 (0.88)              | -0.15 (-0.38; 0.07)         | -0.00 (-0.27; 0.26)    |
| 19 months                           | 41                           | -0.25 (-0.59; 0.10)      | -0.37     | -0.12 (-1.55; 1.31)      | 0.15 (-4.37; 4.67)                  | -0.42 (0.70)                   | -0.27 (0.75)              | -0.40 (-0.63; -0.18)        | -0.16 (-0.43; 0.12)    |
| <b>Main effect of randomization</b> | 246                          | -0.06 (-0.17; 0.05)      | -0.09     | -0.04 (-0.19; 0.11)      | -0.14 (-0.41; 0.12)                 |                                |                           |                             |                        |
| <b>Test for interaction*:</b>       | F(8, 87.5) = 1.73 p = 0.1022 |                          |           |                          |                                     |                                |                           |                             |                        |

\* Interaction of follow-up time point (categorical) and randomization group

The main effect of time was not estimated, as this was not the main interest.
