# Supplementary material for: Effect of home-based specialised palliative care and dyadic psychological intervention on caregiver anxiety and depression: a randomised controlled trial
Source: PubMed Central journal article supplement (PMC6265292; doi:10.1038/s41416-018-0193-8), 2018-11-14
Supplement: 41416_2018_193_MOESM5_ESM.pdf [file 41416_2018_193_MOESM5_ESM.pdf]

**Table S3. Estimated odds ratios for caregivers in the intervention compared to the control group of scoring above cut-offs (cases) for anxiety and depression (Online only)**

| Follow-up time point                | Anxiety                         |                   | Depression                       |                   |
|-------------------------------------|---------------------------------|-------------------|----------------------------------|-------------------|
|                                     | <i>n</i>                        | OR* (95% CI)      | <i>n</i>                         | OR* (95% CI)      |
| 2 weeks                             | 192                             | 0.63 (0.28; 1.44) | 195                              | 1.37 (0.61; 3.11) |
| 4 weeks                             | 187                             | 0.86 (0.35; 2.11) | 188                              | 0.77 (0.34; 1.75) |
| 8 weeks                             | 173                             | 0.57 (0.25; 1.30) | 172                              | 0.40 (0.17; 0.92) |
| 6 months                            | 108                             | 0.43 (0.16; 1.14) | 108                              | 0.38 (0.14; 0.98) |
| <b>Bereavement follow-up</b>        |                                 |                   |                                  |                   |
| 2 weeks                             | 131                             | 0.38 (0.15; 0.97) | 131                              | 0.62 (0.27; 1.40) |
| 2 months                            | 125                             | 0.48 (0.19; 1.23) | 125                              | 0.42 (0.17; 1.00) |
| 7 months                            | 101                             | 0.61 (0.19; 1.96) | 101                              | 0.95 (0.33; 2.78) |
| 13 months                           | 60                              | 0.60 (0.11; 3.45) | 60                               | 0.50 (0.13; 1.90) |
| 19 months                           | 41                              | 0.28 (0.01; 5.48) | 41                               | 1.40 (0.21; 9.35) |
| <b>Test for interaction†</b>        | Chi2(8) = 2.25, <i>p</i> = 0.97 |                   | Chi2(8) = 10.36, <i>p</i> = 0.24 |                   |
| <b>Main effect of randomization</b> | 246                             | 0.55 (0.39; 0.78) | 246                              | 0.65 (0.40; 1.07) |

\* Reference: control group.

† Interaction of follow-up time point (categorical) and randomization group

The main effect of time was not estimated, as this was not the main interest.
